# Supplementary material
Source: PubMed Central journal article supplement (PMC3072875)
Supplement: supp_blood-2010-08-301929_Document1.pdf [file supp_blood-2010-08-301929_Document1.pdf]

**Table S1. Multivariate analyses of time to initial infused therapy**

| <b>Variable</b>                          | <b>Level</b> | <b>Hazard Ratio (95% CI)</b> |
|------------------------------------------|--------------|------------------------------|
| <b>Age</b>                               | 66-69        | reference                    |
|                                          | 70-74        | 0.97 (0.85 - 1.11)           |
|                                          | 75-79        | 0.90 (0.79 - 1.02)           |
|                                          | ≥ 80         | 0.64 (0.56 - 0.73)           |
| <b>Gender</b>                            | Female       | reference                    |
|                                          | Male         | 1.32 (1.21 - 1.44)           |
| <b>Race</b>                              | White        | reference                    |
|                                          | Black        | 1.02 (0.83 - 1.26)           |
|                                          | Other        | 0.64 (0.49 - 0.84)           |
|                                          | Hispanic     | 1.20 (0.94 - 1.54)           |
| <b>Stage at Diagnosis</b>                | Non-advanced | reference                    |
|                                          | Advanced     | 2.00 (1.82 - 2.20)           |
| <b>NCI Comorbidity Score</b>             | 0            | reference                    |
|                                          | 1            | 0.96 (0.86 - 1.07)           |
|                                          | 2            | 0.86 (0.73 - 1.02)           |
|                                          | ≥ 3          | 0.64 (0.51 - 0.81)           |
| <b>Year of Diagnosis</b>                 | 1999         | reference                    |
|                                          | 2000-2002    | 0.97 (0.81 - 1.15)           |
|                                          | 2003-2005    | 0.90 (0.75 - 1.08)           |
| <b>Percent age 25+ with Some College</b> | 0-24%        | reference                    |
|                                          | ≥ 25%        | 0.97 (0.89 - 1.07)           |
| <b>Percent Living in Poverty</b>         | 0-5%         | reference                    |
|                                          | 6-11%        | 0.94 (0.84 - 1.05)           |
|                                          | ≥12%         | 0.88 (0.78 - 1.00)           |
| <b>MSA Size</b>                          | Big Metro    | reference                    |
|                                          | Metro        | 1.00 (0.90 - 1.12)           |
|                                          | Urban        | 1.03 (0.85 - 1.24)           |
|                                          | Less Urban   | 0.96 (0.82 - 1.12)           |
|                                          | Rural        | 0.97 (0.73 - 1.29)           |

Note: Hazard ratios less than 1.0 indicate a lower rate of treatment initiation.

**Table S2. Stratified analyses of mortality by age (all treatment groups)**

| Variable                | Level                       | Hazard Ratio (95% CI) |                    |                     |
|-------------------------|-----------------------------|-----------------------|--------------------|---------------------|
|                         |                             | Overall<br>N=2,040    | Age < 70<br>N=264  | Age ≥ 70<br>N=1,776 |
| Initial Infused Therapy | Chemotherapy alone          | reference             |                    |                     |
|                         | Rituximab alone             | 0.60 (0.49 - 0.73)    | 0.48 (0.17 - 1.33) | 0.61 (0.50 - 0.75)  |
|                         | Rituximab plus chemotherapy | 0.75 (0.62 - 0.91)    | 0.87 (0.52 - 1.45) | 0.71 (0.58 - 0.88)  |
| Age                     | 66-69                       | reference             |                    |                     |
|                         | 70-74                       | 1.33 (1.06 - 1.67)    | n/a                | n/a                 |
|                         | 75-79                       | 1.65 (1.32 - 2.06)    | n/a                | n/a                 |
|                         | ≥ 80                        | 2.41 (1.94 - 3.00)    | n/a                | n/a                 |
| Gender                  | Female                      | reference             |                    |                     |
|                         | Male                        | 1.35 (1.19 - 1.53)    | 1.01 (0.67 - 1.52) | 1.33 (1.17 - 1.52)  |
| Race                    | White                       | reference             |                    |                     |
|                         | Black                       | 1.36 (1.04 - 1.77)    | 0.73 (0.31 - 1.68) | 1.46 (1.10 - 1.93)  |
|                         | Other                       | 0.87 (0.57 - 1.32)    | 0.45 (0.11 - 1.85) | 0.97 (0.63 - 1.51)  |
|                         | Hispanic                    | 1.13 (0.80 - 1.58)    | 0.51 (0.18 - 1.46) | 1.14 (0.80 - 1.62)  |
| Stage                   | Non-advanced                | reference             |                    |                     |
|                         | Advanced                    | 1.41 (1.24 - 1.60)    | 1.47 (0.92 - 2.36) | 1.53 (1.34 - 1.75)  |
| NCI Comorbidity Score   | 0                           | reference             |                    |                     |
|                         | 1                           | 1.10 (0.94 - 1.28)    | 1.33 (0.79 - 2.25) | 1.10 (0.94 - 1.30)  |
|                         | 2                           | 1.22 (0.99 - 1.51)    | 0.64 (0.27 - 1.53) | 1.31 (1.05 - 1.63)  |
|                         | ≥3                          | 1.50 (1.13 - 1.98)    | 1.81 (0.52 - 6.26) | 1.59 (1.19 - 2.13)  |

Note: Analyses stratified by age include rituximab alone because both treatment selection and outcomes are associated with age. Patients using rituximab monotherapy may be very different patients in ways that are not captured by these variables. Models are also adjusted for potential confounding from year of infusion, education, poverty, and MSA size.

**Table S3. Multivariate analysis of hematological interventions**

| Variable                          | Level                       | Odds Ratio (95% CI) |                    |                    |
|-----------------------------------|-----------------------------|---------------------|--------------------|--------------------|
|                                   |                             | Anemia              | Neutropenia        | Thrombocytopenia   |
| Initial Infused Therapy           | Chemotherapy alone          | reference           |                    |                    |
|                                   | Rituximab alone             | 0.36 (0.27 - 0.47)  | 0.17 (0.08 - 0.35) | 0.49 (0.25 - 0.94) |
|                                   | Rituximab plus chemotherapy | 1.55 (1.17 - 2.04)  | 1.98 (1.42 - 2.75) | 1.63 (1.02 - 2.59) |
| Status at Start of Therapy        | Not pre-existing            | reference           |                    |                    |
|                                   | Pre-existing                | 2.80 (2.28 - 3.45)  | 4.15 (2.31 - 7.45) | 3.80 (2.48 - 5.82) |
| Age                               | 66-69                       | reference           |                    |                    |
|                                   | 70-74                       | 1.16 (0.85 - 1.59)  | 0.71 (0.48 - 1.05) | 0.99 (0.54 - 1.81) |
|                                   | 75-79                       | 1.33 (0.97 - 1.81)  | 0.61 (0.41 - 0.91) | 0.72 (0.39 - 1.34) |
|                                   | ≥ 80                        | 1.56 (1.14 - 2.13)  | 0.43 (0.28 - 0.65) | 0.93 (0.51 - 1.68) |
| Gender                            | Female                      | reference           |                    |                    |
|                                   | Male                        | 0.87 (0.72 - 1.05)  | 1.24 (0.94 - 1.63) | 1.18 (0.80 - 1.72) |
| Race                              | White                       | reference           |                    |                    |
|                                   | Black                       | 1.31 (0.84 - 2.06)  | 0.89 (0.46 - 1.74) | 0.22 (0.05 - 0.93) |
|                                   | Other                       | 0.89 (0.51 - 1.55)  | 0.78 (0.32 - 1.91) | 0.66 (0.16 - 2.81) |
|                                   | Hispanic                    | 0.72 (0.42 - 1.23)  | 1.41 (0.70 - 2.84) | 1.35 (0.57 - 3.19) |
| NCI Comorbidity Score             | 0                           | reference           |                    |                    |
|                                   | 1                           | 1.25 (0.99 - 1.58)  | 1.10 (0.79 - 1.53) | 1.40 (0.91 - 2.15) |
|                                   | 2                           | 1.15 (0.81 - 1.63)  | 0.63 (0.35 - 1.13) | 0.94 (0.47 - 1.90) |
|                                   | ≥3                          | 1.57 (0.94 - 2.62)  | 1.13 (0.57 - 2.25) | 0.54 (0.16 - 1.77) |
| Year of Initial Infusion          | 2000-2001                   | reference           |                    |                    |
|                                   | 2002-2003                   | 1.28 (0.98 - 1.67)  | 0.63 (0.44 - 0.91) | 0.86 (0.51 - 1.45) |
|                                   | 2004-2007                   | 1.14 (0.89 - 1.46)  | 0.60 (0.43 - 0.83) | 0.80 (0.49 - 1.29) |
| Percent age 25+ with Some College | 0-24%                       | reference           |                    |                    |
|                                   | ≥ 25%                       | 1.00 (0.81 - 1.22)  | 1.46 (1.09 - 1.97) | 0.89 (0.60 - 1.33) |

(continued on next page)

---

|                                  |            |                    |                    |                    |
|----------------------------------|------------|--------------------|--------------------|--------------------|
| <b>Percent Living in Poverty</b> | 0-5%       | reference          |                    |                    |
|                                  | 6-11%      | 0.99 (0.79 - 1.25) | 0.79 (0.58 - 1.09) | 1.09 (0.69 - 1.72) |
|                                  | ≥12%       | 0.95 (0.73 - 1.23) | 0.70 (0.48 - 1.03) | 1.28 (0.76 - 2.14) |
| <b>MSA Size</b>                  | Big Metro  | reference          |                    |                    |
|                                  | Metro      | 0.74 (0.59 - 0.92) | 0.85 (0.62 - 1.17) | 0.81 (0.52 - 1.28) |
|                                  | Urban      | 0.91 (0.61 - 1.36) | 0.73 (0.41 - 1.32) | 0.87 (0.41 - 1.87) |
|                                  | Less Urban | 0.74 (0.53 - 1.02) | 0.76 (0.47 - 1.25) | 0.77 (0.40 - 1.50) |
|                                  | Rural      | 0.41 (0.22 - 0.76) | 0.41 (0.12 - 1.39) | 0.75 (0.22 - 2.60) |

Note: "Status" refers to whether each condition was present at the initiation of infused therapy (i.e., "pre-existing"). Patients using rituximab monotherapy may be very different patients in ways that are not captured by these variables. Direct comparison to other the other groups may not be appropriate.

---

---

Figure S1. Selection of patients into the cohort

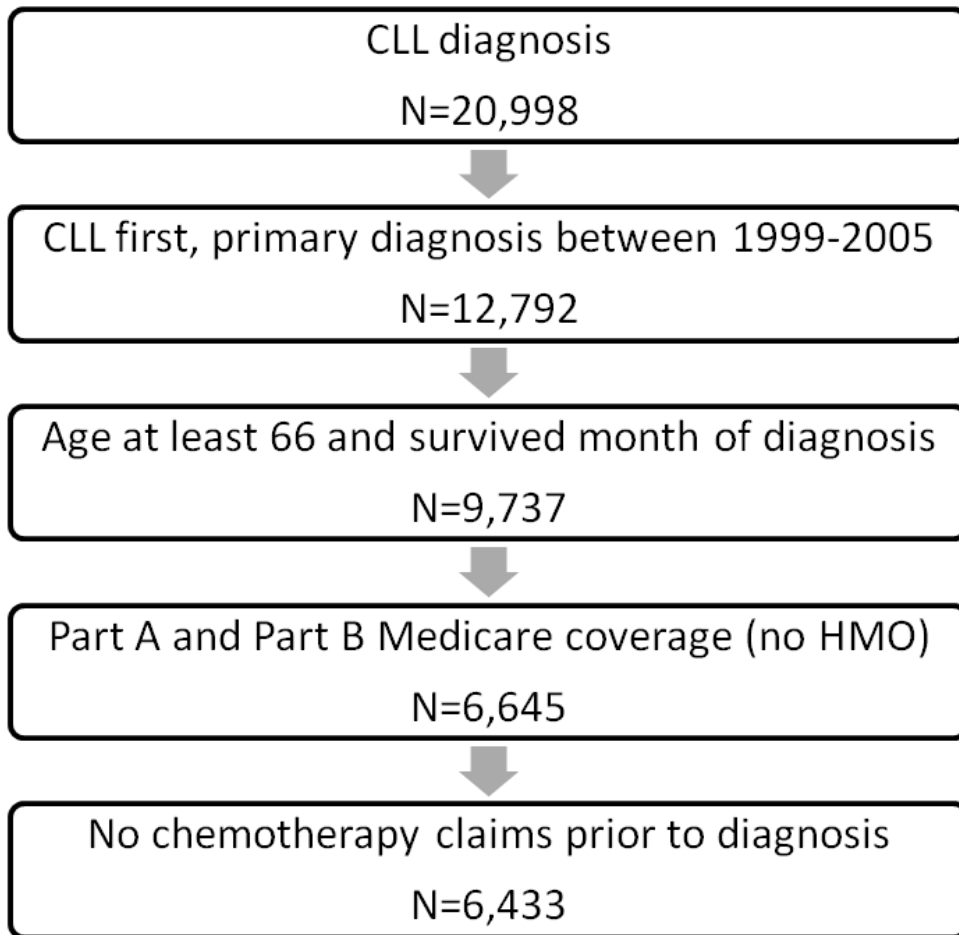

Figure S2. Distribution of propensity scores

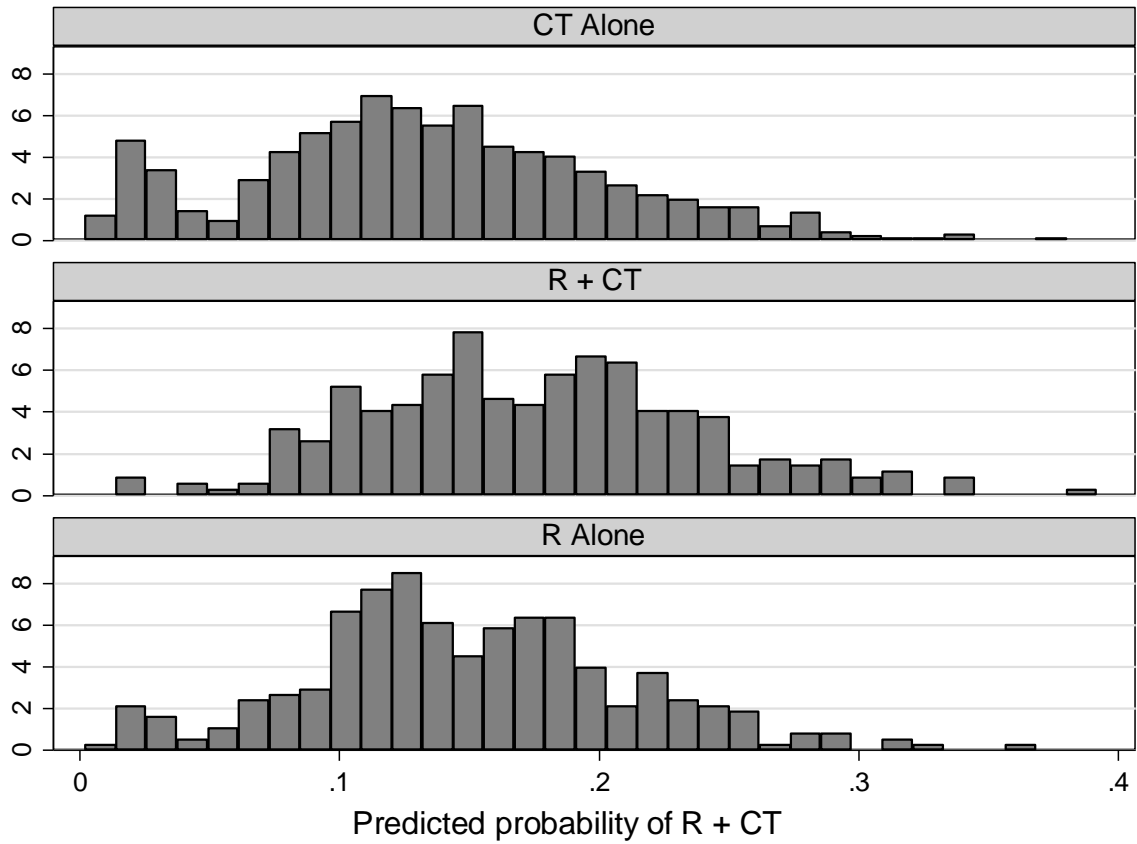

Note: CT=chemotherapy; R=rituximab. Approximate quintiles of the predicted probability of receiving R+CT are 0.08, 0.12, 0.16, and 0.22 (based on the entire population distribution).

Figure S2. Unadjusted survival (all treatments in one figure)

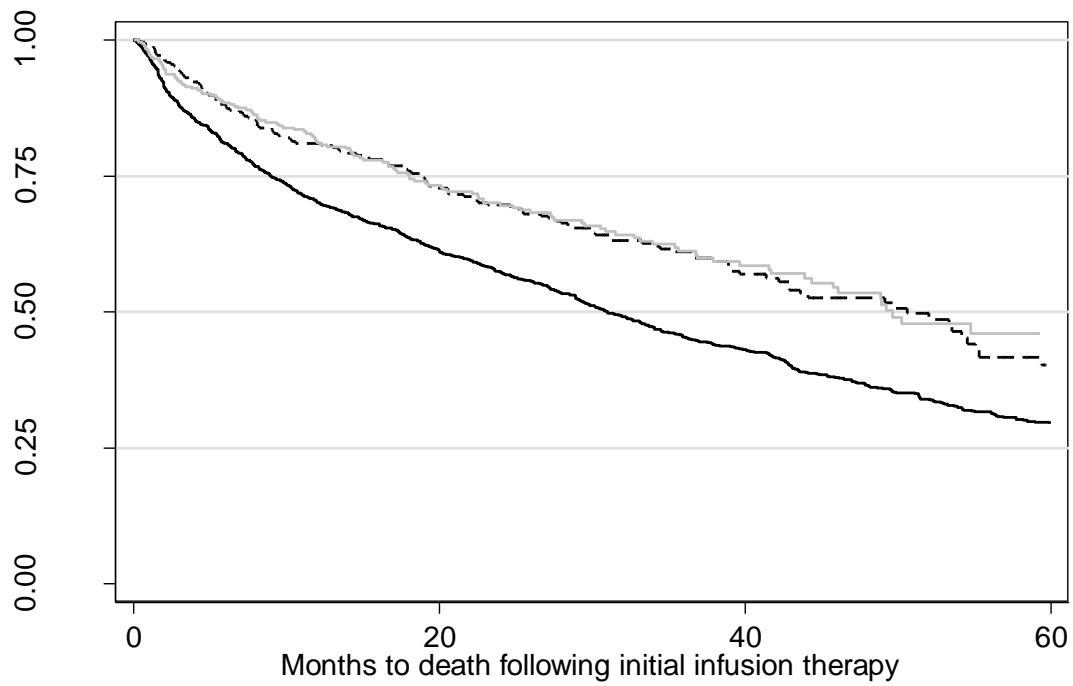

|          |      |     |     |     |
|----------|------|-----|-----|-----|
| CT Alone | 1429 | 765 | 392 | 153 |
| R + CT   | 292  | 190 | 91  | 22  |
| R Alone  | 319  | 185 | 82  | 22  |

Note: Solid black line is chemotherapy alone, solid dashed line is rituximab plus chemotherapy, and solid gray line is rituximab monotherapy
